# Supplementary material for: Biomimetic black phosphorus nanosheets codeliver CDK9 and BRD4 inhibitors for gastric cancer targeted therapy
Source: Royal Society of Chemistry journal article supplement (doi:10.1039/d3tb00046j), 2023-01-01

**Table S1 Drug loading content (DLC, wt%) and loading efficiency (DLE, %) of CI and BI into M@BP determined by HPLC**

| Nanosystem          | Drug  | DLC (wt %) |            | DLE (%)     |
|---------------------|-------|------------|------------|-------------|
|                     |       | Theory     | Determined |             |
| M@BP <sub>CBI</sub> | CI    | 10         | 9.29       | 96.90       |
|                     | BI    | 10         | 9.44       | 98.40       |
|                     | CI/BI | 10         | 9.21/9.35  | 96.19/98.31 |

**Figure S1**

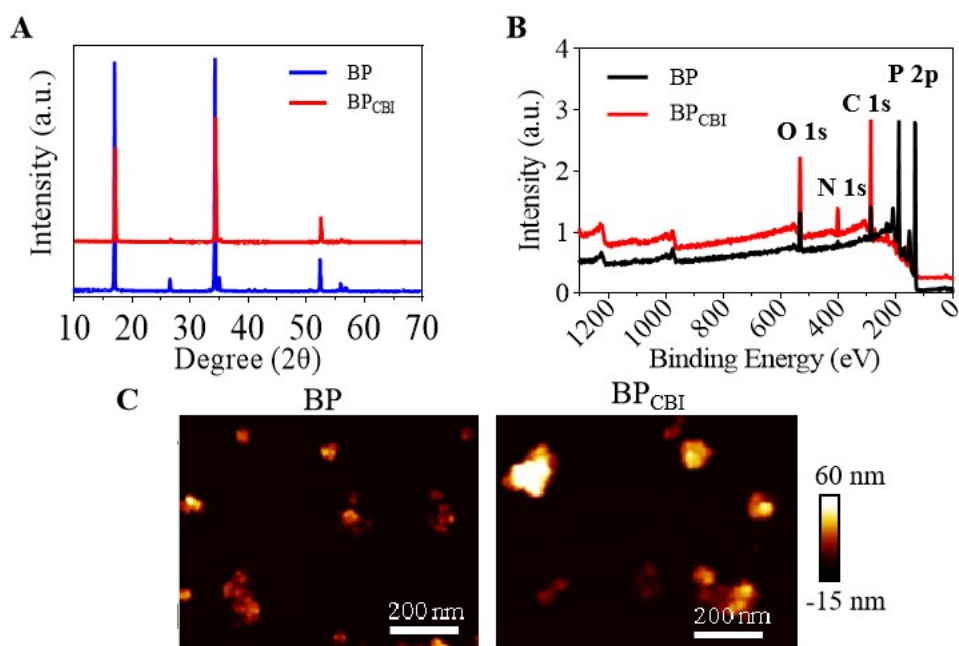

The characterization of BP and CBI-loaded BP with XRD assay (A), XPS spectra (B) and AFM (C), respectively

**Figure S2**

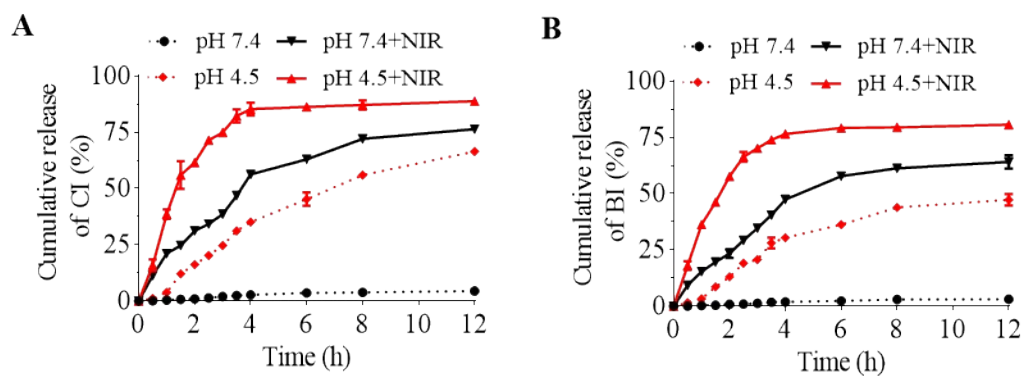

The cumulative release of CI (A) and BI (B) under different pH conditions (pH7.4 and 4.5) treated with or without NIR irradiation was determined by HPLC

**Figure S3**

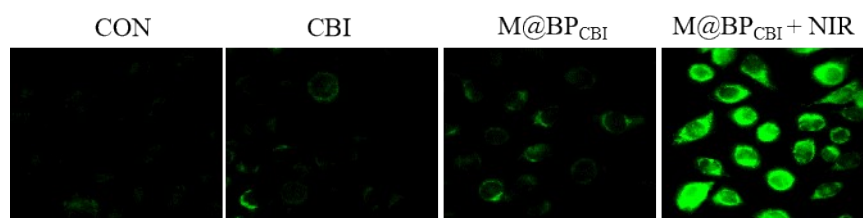

MFC cells were treated with different formulations (CI: 9.8  $\mu\text{M}$ , BI: 10  $\mu\text{M}$ , BP: 45  $\mu\text{g mL}^{-1}$ ) for 6h followed with or without NIR irradiation (NIR irradiation: 1.5  $\text{W cm}^{-2}$ ) for 10 min, incubated with ROS probe of DCFH-DA for 30 min, and then examined under fluorescence microscope

**Figure S4**

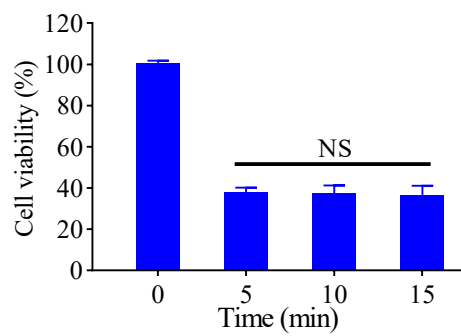

The CI and BI were incubated at 50 °C for different time, then added to MFC cells (Concentration: 10  $\mu$ M) for 48 h and examined by MTT assay. NS indicated non-significant difference

**Figure S5**

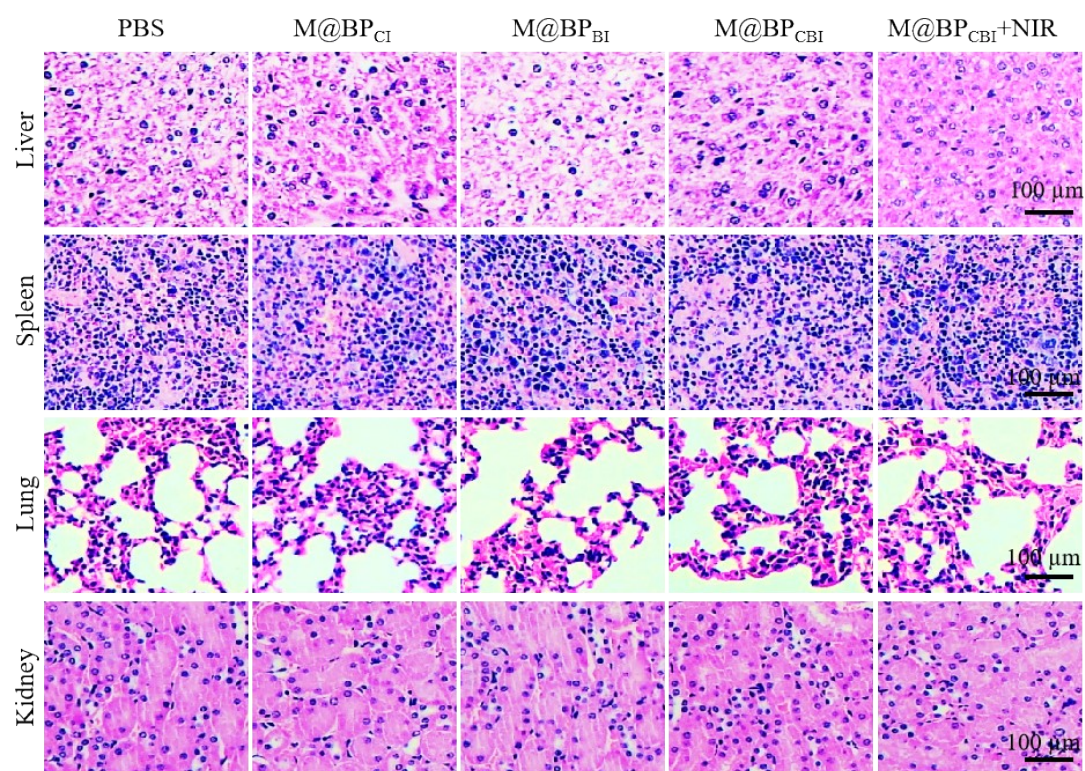

H&E staining of the major organs separated from different groups at the end of experiments

**Figure S6**

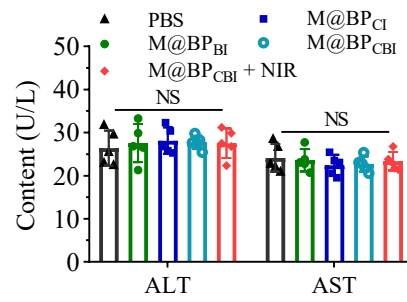

Aspartate aminotransferase (AST) and alanine aminotransferase (ALT) measurement in mice with different treatments for liver function assay at the end of experiments. NS indicated non-significant difference

Raw data

Pol II pSer2

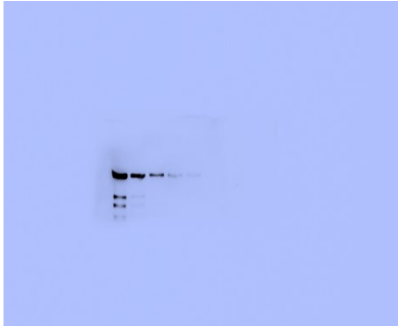

Pol II

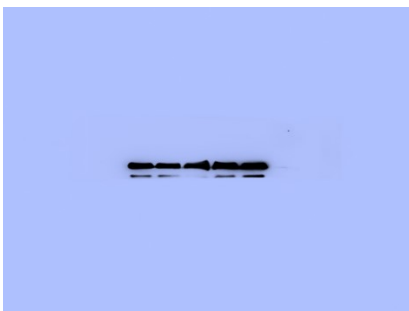

CDK9

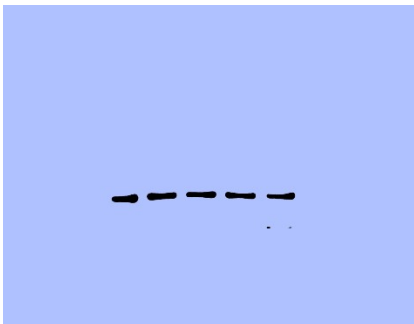

BRD4

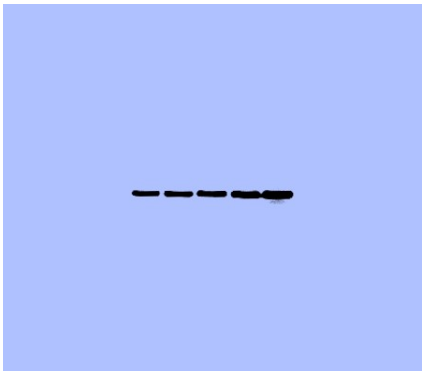



MYC

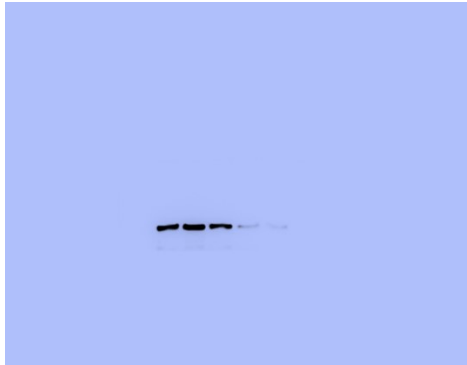

Cleaved Casp.3

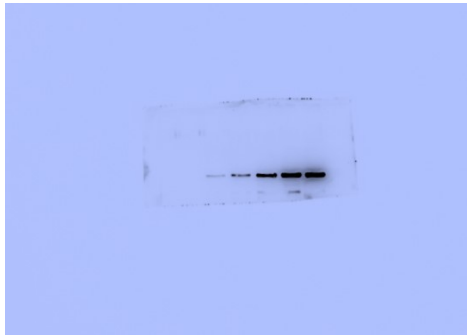

GAPDH

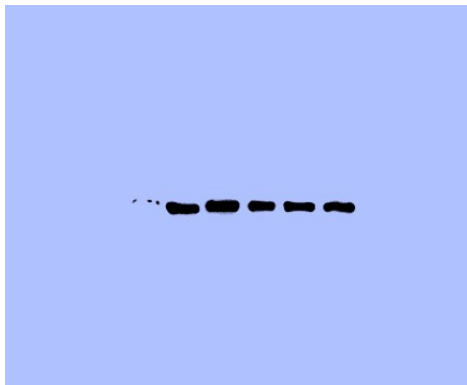

Supplement: d3tb00046j1.pdf [file d3tb00046j1.pdf]
